# Supplementary material for: A systematic review of routing attacks detection in wireless sensor networks
Source: PeerJ Comput Sci. 2022 Oct 21;8:e1135. doi: 10.7717/peerj-cs.1135 (PMC9680892; doi:10.7717/peerj-cs.1135)
Supplement: Supplemental Information 1 [file peerj-cs-08-1135-s001.xlsx]

## Sheet: Evaluation All
No	Article	Attack	No of Metrics	True Detection Rate (TDR)	Energy Consumption	Packet delivery Ratio (PDR)	Detection Accuracy	Communication Overhead	False Detection Rate (FDR)	Throughput	False Positive Rate (FPR)	Computation Overhead	Efficiency	Network Lifetime	End-to-End Delay	Network Performance	Packet Loss Ratio (PLR)	Resource Consumption	Computational Cost	Data Transmission Rate (DTR)	False Alarm Rate	Localization Error	False Negative Rate (FNR)	Detection Time	Memory Overhead	Missed Detection Rate (MDR)	Power Consumption
1	Jensen Shannon Divergence Based Independent Component Analysis to Detect and Prevent Blackhole Attacks in Healthcare WSN	Blackhole	7	*	*	*	*								*						*			*
2	Detecting sybil attacks in clustered WSNs based on energy trust system (ETS)	Sybil	6	*	*			*			*							*							*
3	Novel Sybil attack detection using RSSI and neighbour information to ensure secure Communication in WSN	Sybil	5	*	*			*				*													*
4	Scalable and Distributed Detection Anaysis on Wormhole Links in WSNs for Networked Systems	Wormhole	5	*			*	*				*						*
5	Cost Effective Encryption Based Autonomous Routing Protocol for Efficient and Secure WSNs	*Sybil *Grayhole/SF *Replay *Spoofing *Hello Flood	5		*	*						*						*	*
6	Behavior based Routing Misbehavior Detection in WSNs	*Grayhole/SF *Sinkhole *Blackhole	5			*				*	*				*								*
7	A Light Weight Countermeasure to Forwarding Misbehavior in WSNs: Design, Analysis, and Evaluation	Grayhole/SF	5	*	*	*			*								*
8	Detecting Sinkhole Attack in WSN using Enhanced Particle Swarm Optimization Technique	Sinkhole	5	*		*									*		*				*
11	Lamport Certificateless Signcryption Deep Neural Networks for Data Aggregation Security in WSN	*Sybil *Blackhole	4							*		*			*		*
9	Detecting Sybil nodes in stationary WSNs using learning automaton and client puzzles	Sybil	4	*				*	*			*
10	Design of sinkhole node detection mechanism for hierarchical WSNs	Sinkhole	4	*				*			*	*
12	A New Lightweight Watchdog Based Algorithm for Detecting Sybil Nodes in Mobile WSNs	Sybil	4	*				*	*							*
13	Accurate detection of selective forwarding attack in WSNs	Grayhole/SF	4		*		*		*												*
14	Lightweight Detection of Denial of Service Attacks on WSNs Revisited	Blackhole	3													*				*		*
15	A Data Clustering Algorithm for Detecting Selective forwarding Attack in Cluster Based WSNs	Grayhole/SF	3		*				*																	*
16	Employ DBSCAN and Neighbour Voting to Screen Selective forwarding Attack Under Variable Environment in Event Driven WSNs	Grayhole/SF	3		*				*																	*
17	An adaptive sinkhole aware algorithm in WSNs	Sinkhole	3								*						*						*
18	Design of event driven control strategy for spoofing attacks in WSNs	Spoofing	3					*										*						*
28	Detecting and preventing blackhole and wormhole attacks in wireless bio sensor network using path assignment protocol	*Wormhole *Blackhole	3							*			*						*
19	Secure data aggregation using access control and authentication for WSNs	*Sybil *Sinkhole	3		*		*	*
20	A Novel Model of Sybil Attack in Cluster Based WSNs and Propose a Distributed Algorithm to Defend It	Sybil	3	*				*	*
21	A WSN Based Defence Model against Selective forwarding Attack	Grayhole/SF	3					*										*		*
22	M optimal routes hops strategy: detecting sinkhole attacks in WSNs	Sinkhole	3	*	*						*
23	Secure Data Aggregation in WSN Fujisaki Okamoto(FO) Authentication Scheme against Sybil Attack	Sybil	3		*	*				*
36	Detection and prevention of blackhole and selective forwarding attack in clustered WSN with Active Trust	*Grayhole/SF *Blackhole	2											*		*
24	Performance Analysis on LEACH Protocol in WSN (WSN) Under Blackhole Attack	Blackhole	3		*	*								*
25	An efficient hybrid anomaly detection scheme using K means clustering for WSNs	Blackhole	3	*							*			*
26	An Authenticated Enrolment Scheme of Nodes using Blockchain and Prevention of Collaborative Blackhole Attack in WSN	Blackhole	3			*				*					*
27	A Security Mechanism for Cluster Based WSN against Selective forwarding	Grayhole/SF	3				*							*							*
29	The Design of a Defense Mechanism to Mitigate Sinkhole Attack in Software Defined Wireless Sensor Cognitive Radio Networks	Sinkhole	2			*											*
30	Enhanced TESRP Protocol for Isolation of Selective forwarding Attack in WSN	Grayhole/SF	2							*							*
31	Sinkhole Attack in WSNs Performance Analysis and Detection Methods	Sinkhole	2		*							*
32	Detection of wormhole attacks in mobility based WSNs	Wormhole	2				*					*
33	Leveraging fog computing and software defined systems for selective forwarding attacks detection in mobile WSNs	Grayhole/SF	2				*																				*
34	Low Complexity Signed Response Based Sybil Attack Detection Mechanism in WSNs	Sybil	2																*								*
35	Grey Hole Attack Detection and Prevention Methods in Wireless Sensor Networks	Grayhole/SF	2			*										*
37	DETECTING SYBIL ATTACKS IN WSNS USING SEQUENTIAL ANALYSIS	Sybil	2								*												*
85	Research on Secure Localization Model Based on Trust Valuation in WSNs	*Sybil *Spoofing	1																			*
38	Secure APIT Localization Scheme Against Sybil Attacks in Distributed WSNs	Sybil	2	*				*
39	Multi-Step Detection of Simplex and Duplex Wormhole Attacks over Wireless Sensor Networks	Wormhole	2						*															*
40	Two Hop Monitoring Mechanism Based on Relaxed Flow Conservation Constraints against Selective Routing Attacks in WSNs	Grayhole/SF	2		*		*
41	Securing WSNs for improved performance in cloud based environments	*Grayhole/SF *Sinkhole *Blackhole	2		*					*
42	An energy efficient encryption method for secure dynamic WSN	*Grayhole/SF *Hello Flood	2		*									*
43	An efficient voting based method to detect sink hole in wireless acoustic sensor networks	Sinkhole	2		*									*
44	TMSRS: trust management based secure routing scheme in industrial WSN with fog computing	Grayhole/SF	2		*															*
45	Defence against Blackhole and Selective forwarding Attacks for Medical WSNs in the IoT	*Grayhole/SF *Blackhole	2	*			*
46	A lightweight algorithm for detecting mobile Sybil nodes in mobile WSNs	Sybil	2	*					*
47	A New Algorithm to Defend Against Sybil Attack in Static WSNs Using Mobile Observer Sensor Nodes	Sybil	2	*					*
48	A Secure Group Based Blackhole Node Detection Scheme for Hierarchical WSNs	Blackhole	2	*							*
49	Adaptive and Channel Aware Detection of Selective forwarding Attacks in WSNs	Grayhole/SF	2			*	*
50	Augmented lightweight security scheme with access control model for wireless medical sensor networks	*Wormhole *Sinkhole *Sybil	2			*					*
51	Signature Based Vulnerability Detection Over WSN for Reliable Data Transmission	*Wormhole *Blackhole *Sybil	2			*				*
52	A light weight solution for blackhole attacks in WSNs	*Blackhole *Replay	2			*									*
53	Propagation Modeling and Defending of a Mobile Sensor Work in Wireless Sensor and Actuator Networks	Wormhole	2				*												*
54	Performance Evaluation of WSN Under Hello flood Attack	Hello Flood	2							*					*
55	MDMA: A Multi Data and Multi ACK Verified Selective forwarding Attack Detection Scheme in WSNs	Grayhole/SF	2											*						*
56	WRHT: A Hybrid Technique for Detection of Wormhole Attack in WSNs	Wormhole	2															*	*
57	Learning Based Security Technique for Selective forwarding Attack in Clustered WSN	Grayhole/SF	2										*							*
58	Trust based Selfish Node Detection Mechanism using Beta Distribution in WSN	Grayhole/SF	1														*
59	Detection and Prevention of Blackhole Attacks in WSNs	Blackhole	1													*
60	Futuristic method to detect and prevent blackhole attack in WSNs	Blackhole	1													*
61	Research on the intrusion detection model based on improved cumulative summation and evidence theory for WSN	Sinkhole	1													*
62	Detection of selective forwarding attacks based on adaptive learning automata and Communication quality in WSNs	*Grayhole/SF *Blackhole	1					*
63	Distributed Kalman filtering for robust state estimation over WSNs under malicious cyber attacks	Replay	1					*
64	A key management scheme realising location privacy protection for heterogeneous WSNs	Sinkhole	1		*
65	PCTBC: Power Control Tree Based Cluster Approach for Sybil Attack in WSNs	Sybil	1		*
66	Design of Trusted Security Routing in WSNs Based on Quantum Ant Colony Algorithm	Wormhole	1		*
67	Blackhole attack prevention scheme using a blockchain block approach in SDN enabled WSN	*Blackhole *Replay	1	*
68	A Genetic Based Extreme Gradient Boosting Model for Detecting Intrusions in WSNs	*Grayhole/SF *Blackhole	1	*
69	Detection of blackhole and wormhole attacks in WSN enabled by optimal feature selection using self adaptive multi verse optimiser with deep learning	*Wormhole *Blackhole	1	*
70	An Efficient Intrusion Detection System for Selective forwarding and Clone Attackers in IPv6 based WSNs under Mobility	Grayhole/SF	1	*
71	Location Aided Cooperative Detection of Primary User Emulation Attacks in Cognitive WSNs Using Nonparametric Techniques	Replay	1	*
72	Research on WSN Security Location Based on Received Signal Strength Indicator Sybil Attack	Sybil	1	*
73	TBSD: A Defend Against Sybil Attack in WSNs	Sybil	1	*
74	Identifying localization attacks in WSNs using deep learning	*Sybil *Replay	1				*
75	NISA: Node Identification and Spoofing Attack Detection Based on Clock Features and Radio Information for WSNs	Spoofing	1				*
76	Exploiting Dispersive Power Gain and Delay Spread for Sybil Detection in Industrial WSNs: A Multi Kernel Approach	Sybil	1				*
77	A provenance based defensive technique to determine malevolent selective forwarding attacks in multi hop WSNs	Grayhole/SF	1							*
78	Fuzzy Based Reliability Prediction Model for Secure Routing Protocol Using GA and TLBO for Implementation of Blackhole Attacks in WSN	Blackhole	1																*
79	Beeware Routing Scheme for Detecting Network Layer Attacks in WSNs	*Sybil *Hello Flood *Spoofing	1										*
80	Attack Classification Schema for Smart City WSNs	Grayhole/SF	1										*
81	Public Key Based Authentication and En Route Filtering Scheme in WSNs	Grayhole/SF	1										*
82	Detection of wormhole attacks on IPv6 mobility based WSN	Wormhole	1										*
83	Modeling and Analysis of Worm Propagation in WSNs	Wormhole	1										*
84	Wormhole Detection Based on Ordinal MDS Using RTT in WSN	Wormhole	1										*
86	A Security Localization Algorithm Based on DV Hop Against Sybil Attack in WSNs	Sybil	1																			*
87	The Security DV Hop Algorithm against Multiple Wormhole Node Link in WSN	Wormhole	1																			*

## Sheet: Methods
Method	Papers
Behaviour Based	8
Neighbour Based	8
Received Signal Strength (RSS)	6
Trust Based	6
Cluster based	5
Signature Based	5
Watchdog	5
Network performance	4
Threshold Based	4
elliptic curve cryptography (ECC)	3
Encryption Method	3
Localization Based	3
Blockchain	2
deep learning	2
Distance Vector Hop (DV Hop) Algorithm	2
Genetic Algorithm (GA)	2
Hop Count Based	2
location information	2
voting decision method	2
adaptive learning automata and Communication quality	1
Advanced Encryption Standard (AES)	1
Artificial Bee Colony algorithm	1
Back propagation algorithm	1
bee algorithm	1
classification schema	1
client puzzles theory	1
cloud based	1
complex network theory	1
Cryptograpy	1
Cuckoo search algorithm	1
Data Aggregation	1
data clustering algorithm (DCA)	1
data mining	1
artificial deep neural networks	1
Delphi scheme	1
energy trust system (ETS)	1
Enhanced Particle Swarm Optimization Technique	1
event driven control strategy	1
event driven transmission mechanism	1
evidence theory	1
extreme gradient boosting (XGBoot) classifier	1
Fog Computing	1
Futuristic method	1
Fuzzy Based	1
gap statistical analysis method	1
group based technique	1
identity based encryption (IBE) algorithm	1
Information based	1
IPv6 routing protocol for low power and lossy networks (6LowPAN)	1
Jensen Shannon Divergence Based Independent Component Analysis (JDICA) technique	1
kernel parameter optimization	1
learning automaton (LA)	1
Learning based	1
link quality	1
means of the stochastic Laypunov function	1
microscopic mathematical model	1
multi data and multi ACK (MDMA scheme)	1
multi Kernel based expectation maximization (MKEM)	1
PCTBC: Power Control Tree Based Cluster Approach	1
provenance based technique	1
Quantum Ant Colony Algorithm	1
Range Based	1
Rank Based	1
reverse time synchronization framework	1
round trip time (RTT) base	1
RPL based	1
rule base	1
security mechanism and Fujisaki Okamoto (FO) algorithm	1
sequential probability ratio test	1
signed response (SRES) authentication	1
stability theory of differential equations	1
Stacked Denoising Autoencoder (SDA)	1
stochastic stability theory	1
subjective logic and probabilistic extension of timed automata	1
symmetric key cryptographic algorithm	1
teaching learning based optimization (TLBO)	1
timeout and hop by hop retransmission techniques	1
transmission model	1
upstream node effect	1

## Sheet: dates
2016	19
2017	16
2018	13
2019	16
2020	11
2021	9
2022	3
	87

## Sheet: Journals
Publisher	Publisher Homepage	Number of Papers
Wiley	https://wiley.com/	3
Tech Science	https://www.techscience.com/	3
Springer	https://springer.com/	23
ScienceDirect	https://www.sciencedirect.com/	4
Sage	https://sagepub.com/	2
MDPI	https://www.mdpi.com/	10
InderScience	www.inderscience.com	4
IGI Global	https://www.igi-global.com/	1
IEEE	https://www.ieee.org/	8
Hindawi	www.hindawi.com	6
Exeley	https://www.exeley.com/	1
Elsevier	https://elsevier.com/	7
Google Scholar	https://scholar.google.com/	15
		87

## Sheet: ev2 (2)
		Wormhole
1	Efficiency	4
2	Computational Cost	3
3	Detection Accuracy	3
4	Resource Consumption	2
5	Computation Overhead	2
6	Throughput	2
7	Packet delivery Ratio (PDR)	2
8	True Detection Rate (TDR)	2
9	Localization Error	1
10	False Positive Rate (FPR)	1
11	False Detection Rate (FDR)	1
12	Energy Consumption	1
13	Detection Time	1
14	Communication Overhead	1
		Sybil
1	True Detection Rate (TDR)	10
2	Communication Overhead	7
3	Energy Consumption	6
4	False Detection Rate (FDR)	5
5	Computation Overhead	4
6	Packet delivery Ratio (PDR)	4
7	Throughput	3
8	False Positive Rate (FPR)	3
9	Detection Accuracy	3
10	Localization Error	2
11	Resource Consumption	2
12	Computational Cost	2
13	Memory Overhead	2
14	Packet Loss Ratio (PLR)	1
15	End-to-End Delay	1
16	Efficiency	1
17	False Negative Rate (FNR)	1
18	Network Performance	1
19	Power Consumption	1
		Grayhole/SF
1	Energy Consumption	9
2	Detection Accuracy	6
3	Packet delivery Ratio (PDR)	5
4	Data Transmission Rate (DTR)	4
5	Network Lifetime	4
6	Throughput	4
7	False Detection Rate (FDR)	4
8	True Detection Rate (TDR)	4
9	Packet Loss Ratio (PLR)	3
10	Efficiency	3
11	False Alarm Rate	2
12	Resource Consumption	2
13	Communication Overhead	2
14	Missed Detection Rate (MDR)	2
15	Network Performance	2
16	End-to-End Delay	1
17	Computational Cost	1
18	Computation Overhead	1
19	False Positive Rate (FPR)	1
20	False Negative Rate (FNR)	1
21	Power Consumption	1
		Blackhole
1	True Detection Rate (TDR)	7
2	Throughput	6
3	Packet delivery Ratio (PDR)	6
4	End-to-End Delay	5
5	Network Performance	4
6	Network Lifetime	3
7	False Positive Rate (FPR)	3
8	Energy Consumption	3
9	Computational Cost	2
10	Detection Accuracy	2
11	False Alarm Rate	1
12	Packet Loss Ratio (PLR)	1
13	Localization Error	1
14	Data Transmission Rate (DTR)	1
15	Efficiency	1
16	Computation Overhead	1
17	Detection Time	1
18	Communication Overhead	1
19	False Negative Rate (FNR)	1
		Sinkhole
1	Energy Consumption	6
2	False Positive Rate (FPR)	5
3	Packet delivery Ratio (PDR)	4
4	Packet Loss Ratio (PLR)	3
5	True Detection Rate (TDR)	3
6	End-to-End Delay	2
7	Computation Overhead	2
8	Throughput	2
9	Communication Overhead	2
10	False Negative Rate (FNR)	2
11	False Alarm Rate	1
12	Network Lifetime	1
13	Detection Accuracy	1
14	Network Performance	1
		Replay
1	Packet delivery Ratio (PDR)	2
2	True Detection Rate (TDR)	2
3	End-to-End Delay	1
4	Resource Consumption	1
5	Computational Cost	1
6	Computation Overhead	1
7	Detection Accuracy	1
8	Energy Consumption	1
9	Communication Overhead	1
		Spoofing
1	Resource Consumption	2
2	Localization Error	1
3	Efficiency	1
4	Computational Cost	1
5	Computation Overhead	1
6	Detection Accuracy	1
7	Packet delivery Ratio (PDR)	1
8	Energy Consumption	1
9	Detection Time	1
10	Communication Overhead	1
		Hello Flood
1	Energy Consumption	2
2	End-to-End Delay	1
3	Resource Consumption	1
4	Efficiency	1
5	Computational Cost	1
6	Network Lifetime	1
7	Computation Overhead	1
8	Throughput	1
9	Packet delivery Ratio (PDR)	1
